# Supplementary material for: AromTool: predicting aromatic stacking energy using an atomic neural network model
Source: Royal Society of Chemistry journal article supplement (doi:10.1039/d1cp01954f), 2021-01-01
Supplement: d1cp01954f2.xlsx [file d1cp01954f2.xlsx]

## Sheet: Sheet2
ID	CLASSIFICATION	PICTURE	NAME-A	NAME-B	CCSD(T)/CBS	SOURCE	B3LYP-D3(0)/6-311++G**			XYGJ-OS/6-311++G**			LXYGJ-OS/6-311++G**			M06-2X/6-311++G**			M06-2X-D3(0)/6-311++G**
							Val	Absolute error	Time	Val	Absolute error	Time	Val	Absolute error	Time	Val	Absolute error	Time	Val	Absolute error	Time
1	parallel		benzene	benzene	-2.82	GMTKN55-S66-24	-3.18433	-0.364332	10.18s(wall), 9.82s(cpu)	-2.91065	-0.0906525	41.68s(wall), 41.54s(cpu)	***	--	74.46s(wall), 59.12s(cpu)	-3.69827	-0.878271	12.17s(wall), 12.11s(cpu)	-4.24354	-1.42354	11.90s(wall), 11.87s(cpu)
2	parallel		pyridine	pyridine	-3.9	GMTKN55-S66-25	-4.28328	-0.383275	8.56s(wall), 8.29s(cpu)	-3.82668	0.0733155	36.26s(wall), 35.76s(cpu)	-3.86366	0.0363351	46.90s(wall), 47.16s(cpu)	-4.50938	-0.60938	11.07s(wall), 10.94s(cpu)	-4.99472	-1.09472	11.22s(wall), 11.18s(cpu)
3	parallel		uracil	uracil	-9.83	GMTKN55-S66-26	-11.5486	-1.71863	13.53s(wall), 13.31s(cpu)	-9.87773	-0.0477282	78.58s(wall), 78.31s(cpu)	-9.88286	-0.0528621	195.41s(wall), 140.78s(cpu)	-11.5156	-1.68557	17.08s(wall), 17.22s(cpu)	-12.1085	-2.27853	17.09s(wall), 17.24s(cpu)
4	parallel		benzene	pyridine	-3.44	GMTKN55-S66-27	-3.84881	-0.408811	9.52s(wall), 9.46s(cpu)	-3.50892	-0.0689182	39.32s(wall), 38.15s(cpu)	***	--	55.99s(wall), 56.29s(cpu)	-4.30617	-0.866168	11.83s(wall), 11.86s(cpu	-4.81756	-1.37756	11.84s(wall), 11.79s(cpu)
5	parallel		benzene	uracil	-5.71	GMTKN55-S66-28	-6.30983	-0.599832	13.96s(wall), 13.46s(cpu)	-5.88342	-0.173418	63.77s(wall), 61.66s(cpu)	***	--	91.00s(wall), 73.69s(cpu)	-7.22663	-1.51663	15.22s(wall), 15.40s(cpu)	-7.79782	-2.08782	15.05s(wall), 15.09s(cpu)
6	parallel		pyridine	uracil	-6.82	GMTKN55-S66-29	-7.40572	-0.585721	12.32s(wall), 12.03s(cpu)	-6.82864	-0.00864	60.02s(wall), 59.80s(cpu)	-6.84791	-0.0279064	137.81s(wall), 95.93s(cpu)	-7.97563	-1.15563	16.66s(wall), 16.71s(cpu)	-8.50089	-1.68089	15.85s(wall), 15.96s(cpu)
7	parallel		pyrazine	pyrazine	-4.255	GMTKN55-S22-12	-4.84373	-0.588726	6.46s(wall), 6.27s(cpu)	-4.13101	0.123994	31.31s(wall), 28.96s(cpu)	-4.1567	0.0983032	41.73s(wall), 41.94s(cpu)	-4.59113	-0.336126	8.22s(wall), 8.24s(cpu)	-4.96949	-0.714491	8.27s(wall), 8.27s(cpu)
8	parallel		indole	benzene	-4.524	GMTKN55-S22-14	-4.61323	-0.0892274	17.13s(wall), 16.75s(cpu)	-4.38021	0.143786	85.88s(wall), 82.86s(cpu)	***	--	197.91s(wall), 144.01s(cpu)	-5.51821	-0.994208	22.28s(wall), 22.41s(cpu)	-6.19563	-1.67163	22.75s(wall), 22.93s(cpu)
9	parallel		trifluorobenzene	benzene	-4.4	GMTKN55-HAL59-11	-5.13767	-0.737668	12.66s(wall), 12.43s(cpu)	-4.99148	-0.591483	67.54s(wall), 65.58s(cpu)	***	--	109.36s(wall), 95.09s(cpu)	-5.93685	-1.53685	18.32s(wall), 15.93s(cpu)	-6.51966	-2.11966	16.20s(wall), 16.13s(cpu)
10	parallel		hexafuorobenzene	benzene	-6.12	GMTKN55-HAL59-12	-7.21845	-1.09845	17.61s(wall), 17.01s(cpu)	-7.34824	-1.22824	103.85s(wall), 102.57s(cpu)	***	--	260.53s(wall), 185.03s(cpu)	-7.69603	-1.57603	21.07s(wall), 21.22s(cpu)	-8.34348	-2.22348	20.86s(wall), 20.91s(cpu)
11	other		benzene	ethene	-1.43	GMTKN55-S66-30	-1.43255	-0.00255055	3.94s(wall), 3.83s(cpu)	-1.18116	0.248839	12.17s(wall), 12.10s(cpu)	***	--	20.64s(wall), 20.42s(cpu)	-2.17914	-0.749136	4.97s(wall), 4.92s(cpu)	-2.46882	-1.03882	4.78s(wall), 4.64s(cpu)
12	other		uracil	ethene	-3.38	GMTKN55-S66-31	-4.02811	-0.648114	6.00s(wall), 5.71s(cpu)	-3.35876	0.0212378	20.10s(wall), 20.22s(cpu)	-3.36425	0.0157452	26.12s(wall), 26.36s(cpu)	-4.44641	-1.06641	7.25s(wall), 7.25s(cpu)	-4.73823	-1.35823	7.35s(wall), 7.39s(cpu)
13	other		uracil	ethyne	-3.74	GMTKN55-S66-32	-4.01162	-0.271624	5.05s(wall), 5.08s(cpu)	-3.79023	-0.0502342	15.60s(wall), 15.44s(cpu)	-3.78631	-0.0463129	34.26s(wall), 29.88s(cpu)	-4.58135	-0.841353	6.21s(wall), 6.30s(cpu)	-4.7716	-1.0316	6.37s(wall), 6.37s(cpu)
14	other		pyridine	ethene	-1.87	GMTKN55-S66-33	-1.91451	-0.0445077	4.05s(wall), 3.70s(cpu)	-1.60846	0.261544	11.99s(wall), 11.87s(cpu)	-1.62374	0.246261	14.46s(wall), 14.55s(cpu)	-2.46922	-0.599225	5.34s(wall), 5.37s(cpu)	-2.72683	-0.856827	5.04s(wall), 4.95s(cpu)
15	CH-PI		benzene	cyclopentane	-3.58	GMTKN55-S66-39	-4.1654	-0.585403	16.29s(wall), 15.94s(cpu)	-3.37879	0.20121	48.71s(wall), 48.03s(cpu)	***	--	58.29s(wall), 58.61s(cpu)	-4.18491	-0.604912	12.58s(wall), 12.60s(cpu)	-4.79351	-1.21351	13.02s(wall), 13.09s(cpu)
16	CH-PI		benzene	neopentane	-2.9	GMTKN55-S66-40	-3.24673	-0.346726	11.57s(wall), 11.56s(cpu)	-2.73557	0.164433	60.70s(wall), 56.84s(cpu)	***	--	95.70s(wall), 75.16s(cpu)	-3.05921	-0.15921	13.84s(wall), 13.72s(cpu)	-3.70466	-0.804664	18.54s(wall), 13.83s(cpu)
17	CH-PI		uracil	pentane	-4.85	GMTKN55-S66-41	-6.34185	-1.49185	17.44s(wall), 16.49s(cpu)	-4.65622	0.193776	70.50s(wall), 70.29s(cpu)	-4.66562	0.18438	173.33s(wall), 124.36s(cpu)	-5.882	-1.032	18.71s(wall), 18.60s(cpu)	-6.64525	-1.79525	23.28s(wall), 23.15s(cpu)
18	CH-PI		uracil	cyclopentane	-4.14	GMTKN55-S66-42	-5.39068	-1.25068	14.07s(wall), 13.88s(cpu)	-4.03551	0.10449	64.97s(wall), 64.81s(cpu)	-4.04136	0.0986423	86.87s(wall), 79.89s(cpu)	-4.80734	-0.667337	16.29s(wall), 16.51s(cpu)	-5.4936	-1.3536	16.50s(wall), 16.53s(cpu)
19	CH-PI		uracil	neopentane	-3.71	GMTKN55-S66-43	-4.70722	-0.997217	14.65s(wall), 14.39s(cpu)	-3.62627	0.083729	77.32s(wall), 71.79s(cpu)	-3.63032	0.0796801	96.84s(wall), 81.36s(cpu)	-4.43837	-0.728365	17.66s(wall), 17.76s(cpu)	-5.12388	-1.41388	17.38s(wall), 17.60s(cpu)
20	CH-PI		benzene	ethyne	-2.87	GMTKN55-S66-50	-3.31538	-0.445376	3.67s(wall), 3.39s(cpu)	-3.31435	-0.444351	12.60s(wall), 12.34s(cpu)	-3.31745	-0.447447	18.48s(wall), 18.37s(cpu)	-3.3546	-0.4846	4.19s(wall), 4.12s(cpu)	-3.51159	-0.641586	4.52s(wall), 4.41s(cpu)
21	CH-PI		benzene	methane	-1.448	GMTKN55-S22-10	-1.61241	-0.16441	3.42s(wall), 3.19s(cpu)	-1.55755	-0.109548	10.03s(wall), 9.05s(cpu)	-1.56196	-0.113964	13.81s(wall), 13.41s(cpu)	-1.70668	-0.258678	4.06s(wall), 3.89s(cpu)	-1.95076	-0.502762	4.09s(wall), 3.81s(cpu)
22	tshape		benzene	benzene	-2.88	GMTKN55-S66-47	-3.27751	-0.397513	8.16s(wall), 8.08s(cpu)	-3.10515	-0.225148	41.17s(wall), 38.57s(cpu)	***	--	91.87s(wall), 67.74s(cpu)	-2.94224	-0.0622384	10.28s(wall), 10.29s(cpu)	-3.38595	-0.505953	10.11s(wall), 10.01s(cpu)
23	tshape		pyridine	pyridine	-3.54	GMTKN55-S66-48	-4.06218	-0.522176	7.98s(wall), 7.68s(cpu)	-3.69973	-0.159733	38.31s(wall), 33.87s(cpu)	-3.70309	-0.163088	52.20s(wall), 51.33s(cpu)	-3.66416	-0.124164	9.92s(wall), 10.00s(cpu)	-4.06084	-0.52084	10.12s(wall), 10.05s(cpu)
24	tshape		benzene	pyridine	-3.33	GMTKN55-S66-49	-3.88749	-0.557489	8.36s(wall), 8.08s(cpu)	-3.59555	-0.265553	38.55s(wall), 37.90s(cpu)	***	--	51.36s(wall), 51.65s(cpu)	-3.55554	-0.225536	10.82s(wall), 10.74s(cpu)	-3.98633	-0.656329	10.91s(wall), 10.79s(cpu)
25	tshape		ethyne	ethyne	-1.52	GMTKN55-S66-51	-1.83769	-0.317685	1.82s(wall), 1.28s(cpu)	-1.70746	-0.187463	2.06s(wall), 1.50s(cpu)	-1.69929	-0.179287	2.64s(wall), 2.14s(cpu)	-1.5812	-0.0612018	1.49s(wall), 1.16s(cpu)	-1.63124	-0.111244	1.67s(wall), 1.29s(cpu)
26	tshape		indole	benzene	-5.627	GMTKN55-S22-21	-5.85122	-0.224217	14.60s(wall), 14.70s(cpu)	-5.7635	-0.136498	80.68s(wall), 78.57s(cpu)	***	--	187.91s(wall), 137.27s(cpu	-5.60358	0.0234235	18.41s(wall), 18.47s(cpu)	-6.17135	-0.544354	18.18s(wall), 18.21s(cpu)
27	OH-PI		benzene	AcOH	-4.71	GMTKN55-S66-52	-5.01844	-0.308439	6.40s(wall), 6.45s(cpu)	-4.85864	-0.148638	21.09s(wall), 20.92s(cpu)	***	--	35.95s(wall), 34.56s(cpu)	-5.20522	-0.495218	7.13s(wall), 6.96s(cpu)	-5.51967	-0.80967	7.24s(wall), 7.26s(cpu)
28	OH-PI		benzene	water	-3.28	GMTKN55-S66-54	-4.09948	-0.819478	3.25s(wall), 3.02s(cpu)	-3.87874	-0.598745	7.41s(wall), 7.10s(cpu)	-4.09948	-0.819478	12.08s(wall), 11.64s(cpu)	-4.33072	-1.05072	3.47s(wall), 3.26s(cpu)	-4.46506	-1.18506	3.34s(wall), 3.06s(cpu)
29	OH-PI		benzene	MeOH	-4.19	GMTKN55-S66-55	-4.89226	-0.702255	4.27s(wall), 4.06s(cpu)	-4.30294	-0.11294	14.71s(wall), 14.61s(cpu)	***	--	15.30s(wall), 15.44s(cpu)	-5.03227	-0.842267	5.00s(wall), 5.06s(cpu)	-5.29043	-1.10043	5.11s(wall), 5.16s(cpu)
30	OH-PI		ethyne	AcOH	-4.87	GMTKN55-S66-60	-5.33603	-0.466032	2.47s(wall), 2.18s(cpu)	-4.67033	0.199667	4.56s(wall), 4.22s(cpu)	-4.65347	0.216535	6.25s(wall), 5.91s(cpu)	-5.27549	-0.405489	2.87s(wall), 2.64s(cpu)	-5.36509	-0.495088	2.74s(wall), 2.38s(cpu)
31	NH-PI		benzene	AcNH2	-4.36	GMTKN55-S66-53	-4.6295	-0.269502	6.18s(wall), 6.19s(cpu)	-4.44234	-0.0823368	30.10s(wall), 27.11s(cpu)	***	--	34.74s(wall), 35.08s(cpu)	-4.6811	-0.3211	7.52s(wall), 7.67s(cpu)	-4.99125	-0.631255	7.69s(wall), 7.59s(cpu)
32	NH-PI		benzene	MeNH2	-3.23	GMTKN55-S66-56	-3.71323	-0.483229	4.90s(wall), 4.92s(cpu)	-3.12436	0.105643	12.11s(wall), 12.13s(cpu)	***	--	24.14s(wall), 23.92s(cpu)	-3.75055	-0.520549	5.34s(wall), 5.40s(cpu)	-4.04808	-0.818084	5.40s(wall), 5.38s(cpu)
33	NH-PI		benzene	peptide	-5.28	GMTKN55-S66-57	-5.62145	-0.341446	8.90s(wall), 8.73s(cpu)	-5.17715	0.10285	40.64s(wall), 40.42s(cpu)	***	--	51.05s(wall), 51.48s(cpu)	-5.86395	-0.583947	11.00s(wall), 11.06s(cpu)	-6.37763	-1.09763	12.54s(wall), 11.33s(cpu)
34	NH-PI		benzene	ammonia	-2.312	GMTKN55-S22-18	-2.81412	-0.502119	3.25s(wall), 2.92s(cpu)	-2.66379	-0.35179	7.47s(wall), 7.33s(cpu)	-2.66916	-0.357164	13.78s(wall), 13.49s(cpu)	-2.95442	-0.64242	3.84s(wall), 3.77s(cpu)	-3.14541	-0.833406	3.64s(wall), 3.34s(cpu)
35	NH-PI		benzene	hydrogen cyanide	-4.541	GMTKN55-S22-19	-4.72984	-0.18884	3.28s(wall), 3.01s(cpu)	-4.83082	-0.289821	8.96s(wall), 8.92s(cpu)	-4.84298	-0.301981	15.62s(wall), 15.45s(cpu)	-5.16968	-0.628682	3.91s(wall), 3.76s(cpu)	-5.31983	-0.778832	3.71s(wall), 3.59s(cpu)
	average							-0.540673			-0.0955247			-0.0852004			-0.693892			-1.10775
